# Supplementary material for: Investigation of n-type doping strategies for Mg3Sb2
Source: Royal Society of Chemistry journal article supplement (doi:10.1039/c8ta03344g), 2018-01-01
Supplement: c8ta03344g1.pdf [file c8ta03344g1.pdf]

## Electronic Supplementary Information

### “Investigation of n-type Doping Strategies for $\text{Mg}_3\text{Sb}_2$ ”

Prashun Gorai,<sup>\*,†,‡</sup> Brenden Ortiz,<sup>†</sup> Eric S. Toberer,<sup>†,‡</sup> and Vladan Stevanović<sup>\*,†,‡</sup>

<sup>†</sup>*Colorado School of Mines, Golden, Colorado 80401, USA*

<sup>‡</sup>*National Renewable Energy Laboratory, Golden, Colorado 80401, USA*

E-mail: pgorai@mines.edu; vstevano@mines.edu

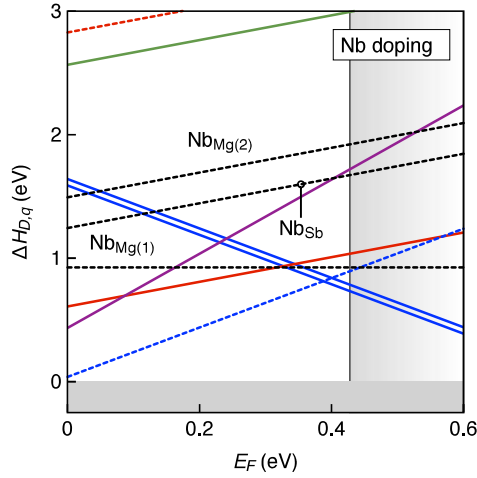

Figure S1: Defect energetics of  $n$ -type doping of  $\text{Mg}_3\text{Sb}_2$  with Nb, under Mg-rich ( $\Delta\mu_{\text{Mg}} = 0$  eV) and most dopant-rich conditions as accommodated by the stability of  $\text{Mg}_3\text{Sb}_2$  in the Nb-Mg-Sb chemical potential phase space. The native defects are also shown for reference.

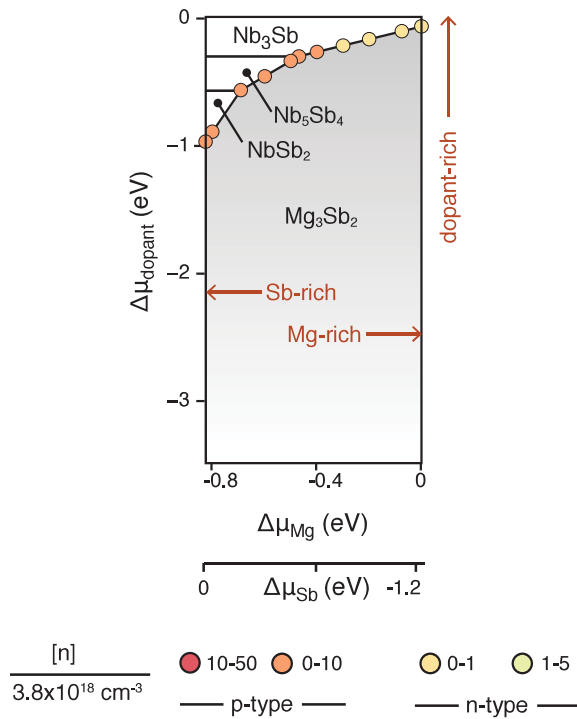

Figure S2: Phase stability of  $\text{Mg}_3\text{Sb}_2$  in the ternary Nb-Mg-Sb chemical potential phase space. The shaded area represents the region of phase stability of  $\text{Mg}_3\text{Sb}_2$ . The x-axis is bounded by Mg-rich/Sb-poor ( $\Delta\mu_{\text{Mg}} = 0$  eV,  $\Delta\mu_{\text{Sb}} = -1.28$  eV) and Mg-poor/Sb-rich ( $\Delta\mu_{\text{Mg}} = -0.83$  eV,  $\Delta\mu_{\text{Sb}} = 0$  eV) conditions. The y-axis denotes  $\Delta\mu_{\text{Nb}}$ , ranging from Nb-rich (0 eV) and below. The markers at the  $\text{Mg}_3\text{Sb}_2$  phase boundary are the free carrier concentrations calculated at 900K, normalized by the free electron concentration in self-doped  $n$ -type  $\text{Mg}_3\text{Sb}_2$  grown under Mg-rich conditions ( $3.8 \times 10^{18} \text{ cm}^{-3}$ ). Red and orange markers denote free hole concentrations while other colors free electron concentrations.

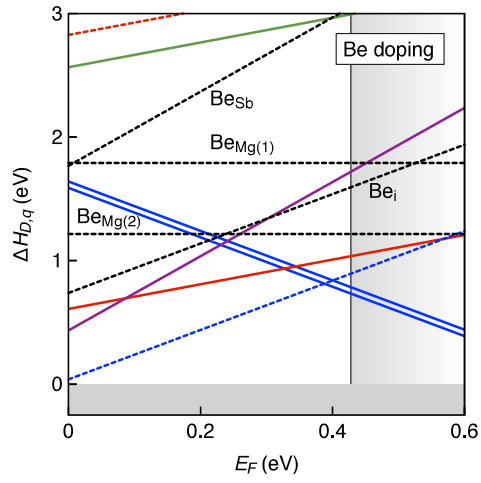

Figure S3: Defect energetics of  $n$ -type doping of  $\text{Mg}_3\text{Sb}_2$  with Be, under Mg-rich ( $\Delta\mu_{\text{Mg}} = 0$  eV) and most dopant-rich conditions as accommodated by the stability of  $\text{Mg}_3\text{Sb}_2$  in the Be-Mg-Sb chemical potential phase space. The native defects are also shown for reference.
